# Supplementary material for: Drug-Induced Lipid Remodeling in Leishmania Parasites
Source: MDPI journal article supplement (doi:10.3390/microorganisms9040790), 2021-04-09
Supplement: s1 [file s1]

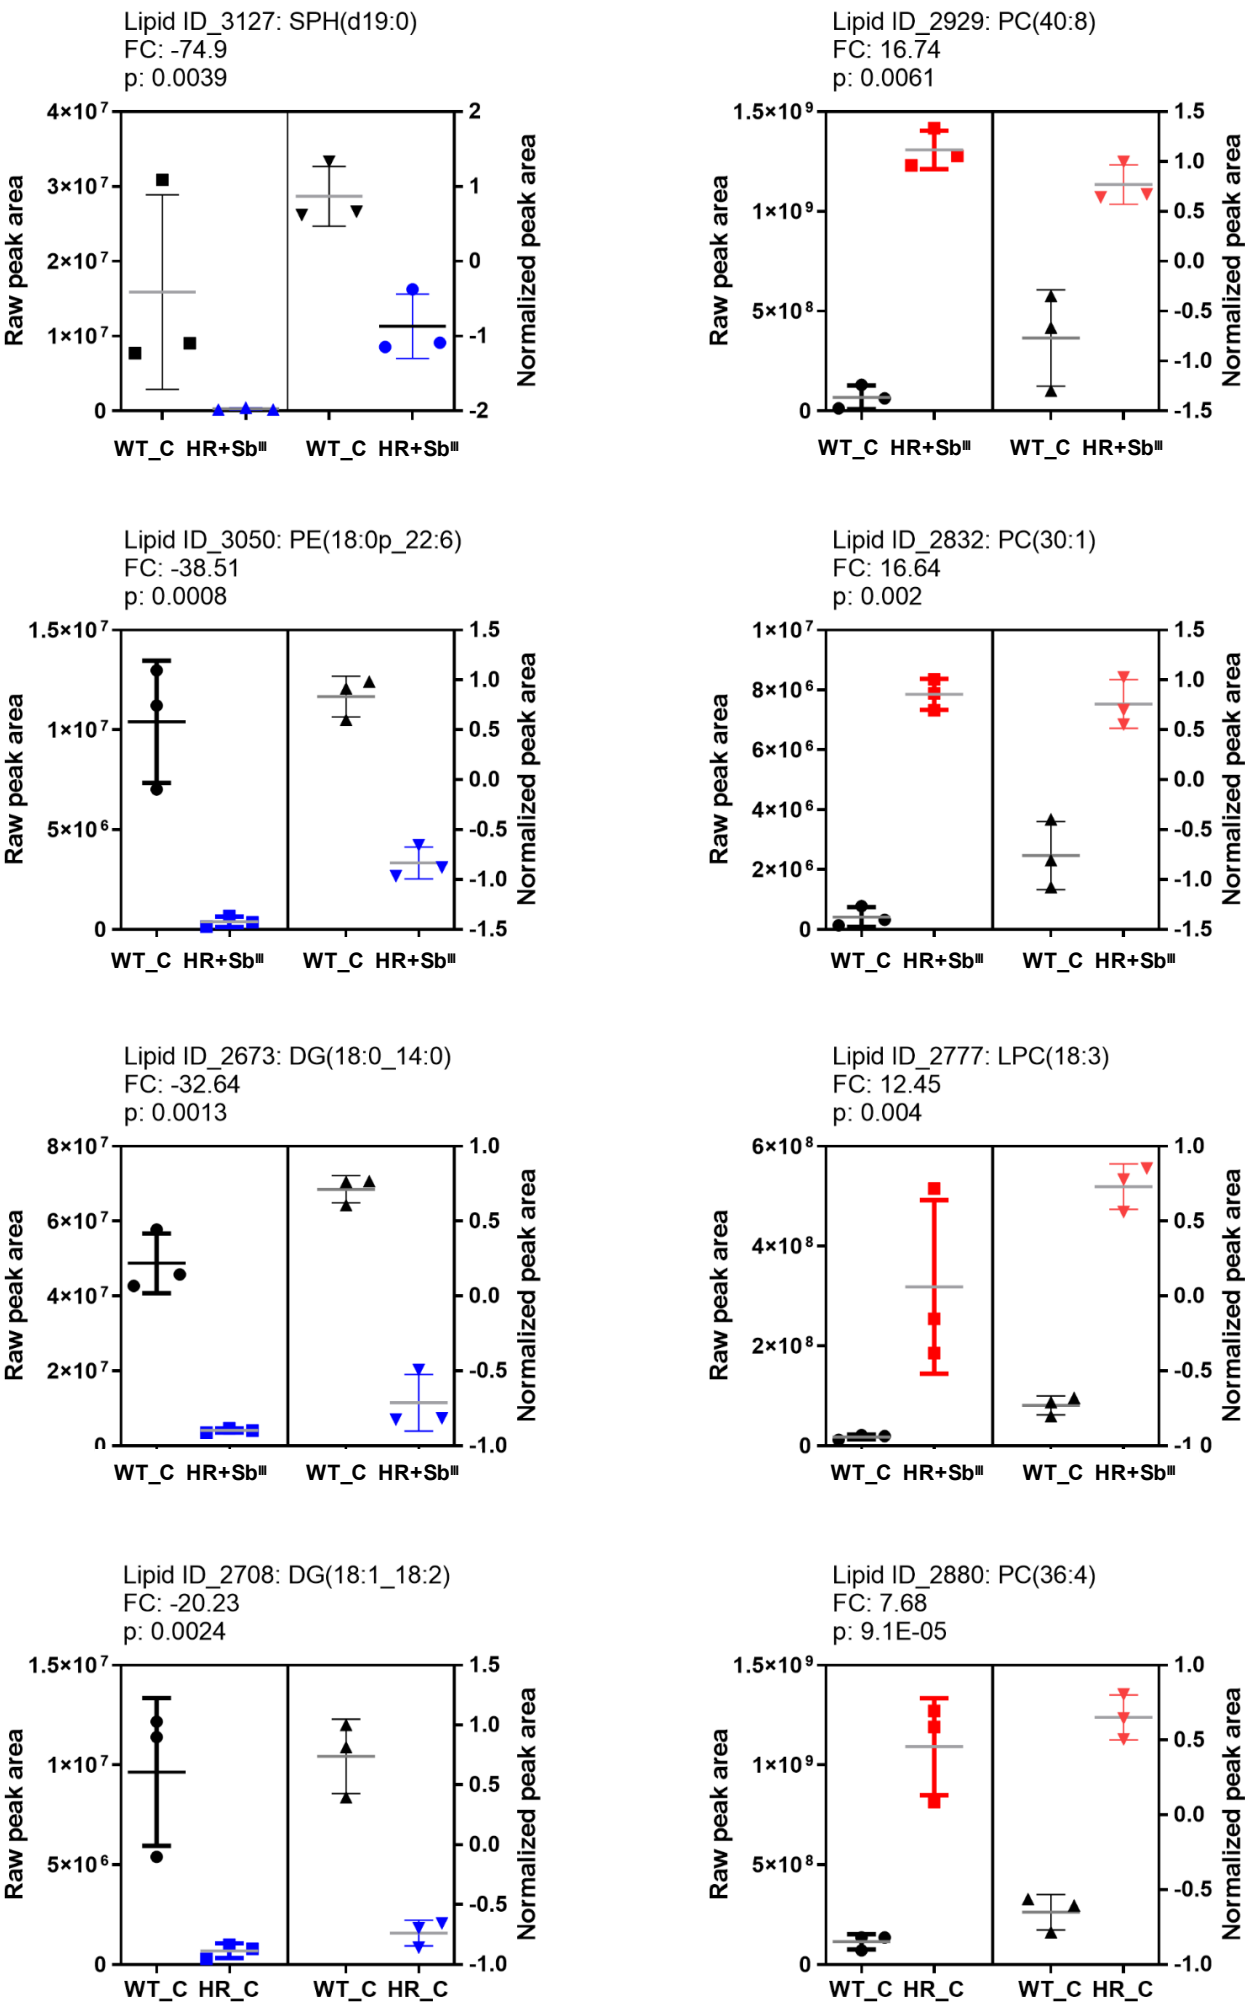

**Supplementary figure 1. Potential biomarkers detected after OPLS-DA for discrimination between resistant and sensitive parasites without drug challenge.** The antimony resistant parasites (HR\_C) were compared with sensitive parasites (WT\_C) in absence of the drug. The downregulated and up-regulated potential lipid biomarkers are highlighted in blue or red, respectively. Raw and normalized peak area intensity are plotted by lipid compound. The fold change (FC) and the raw p-value (p) are included per lipid.

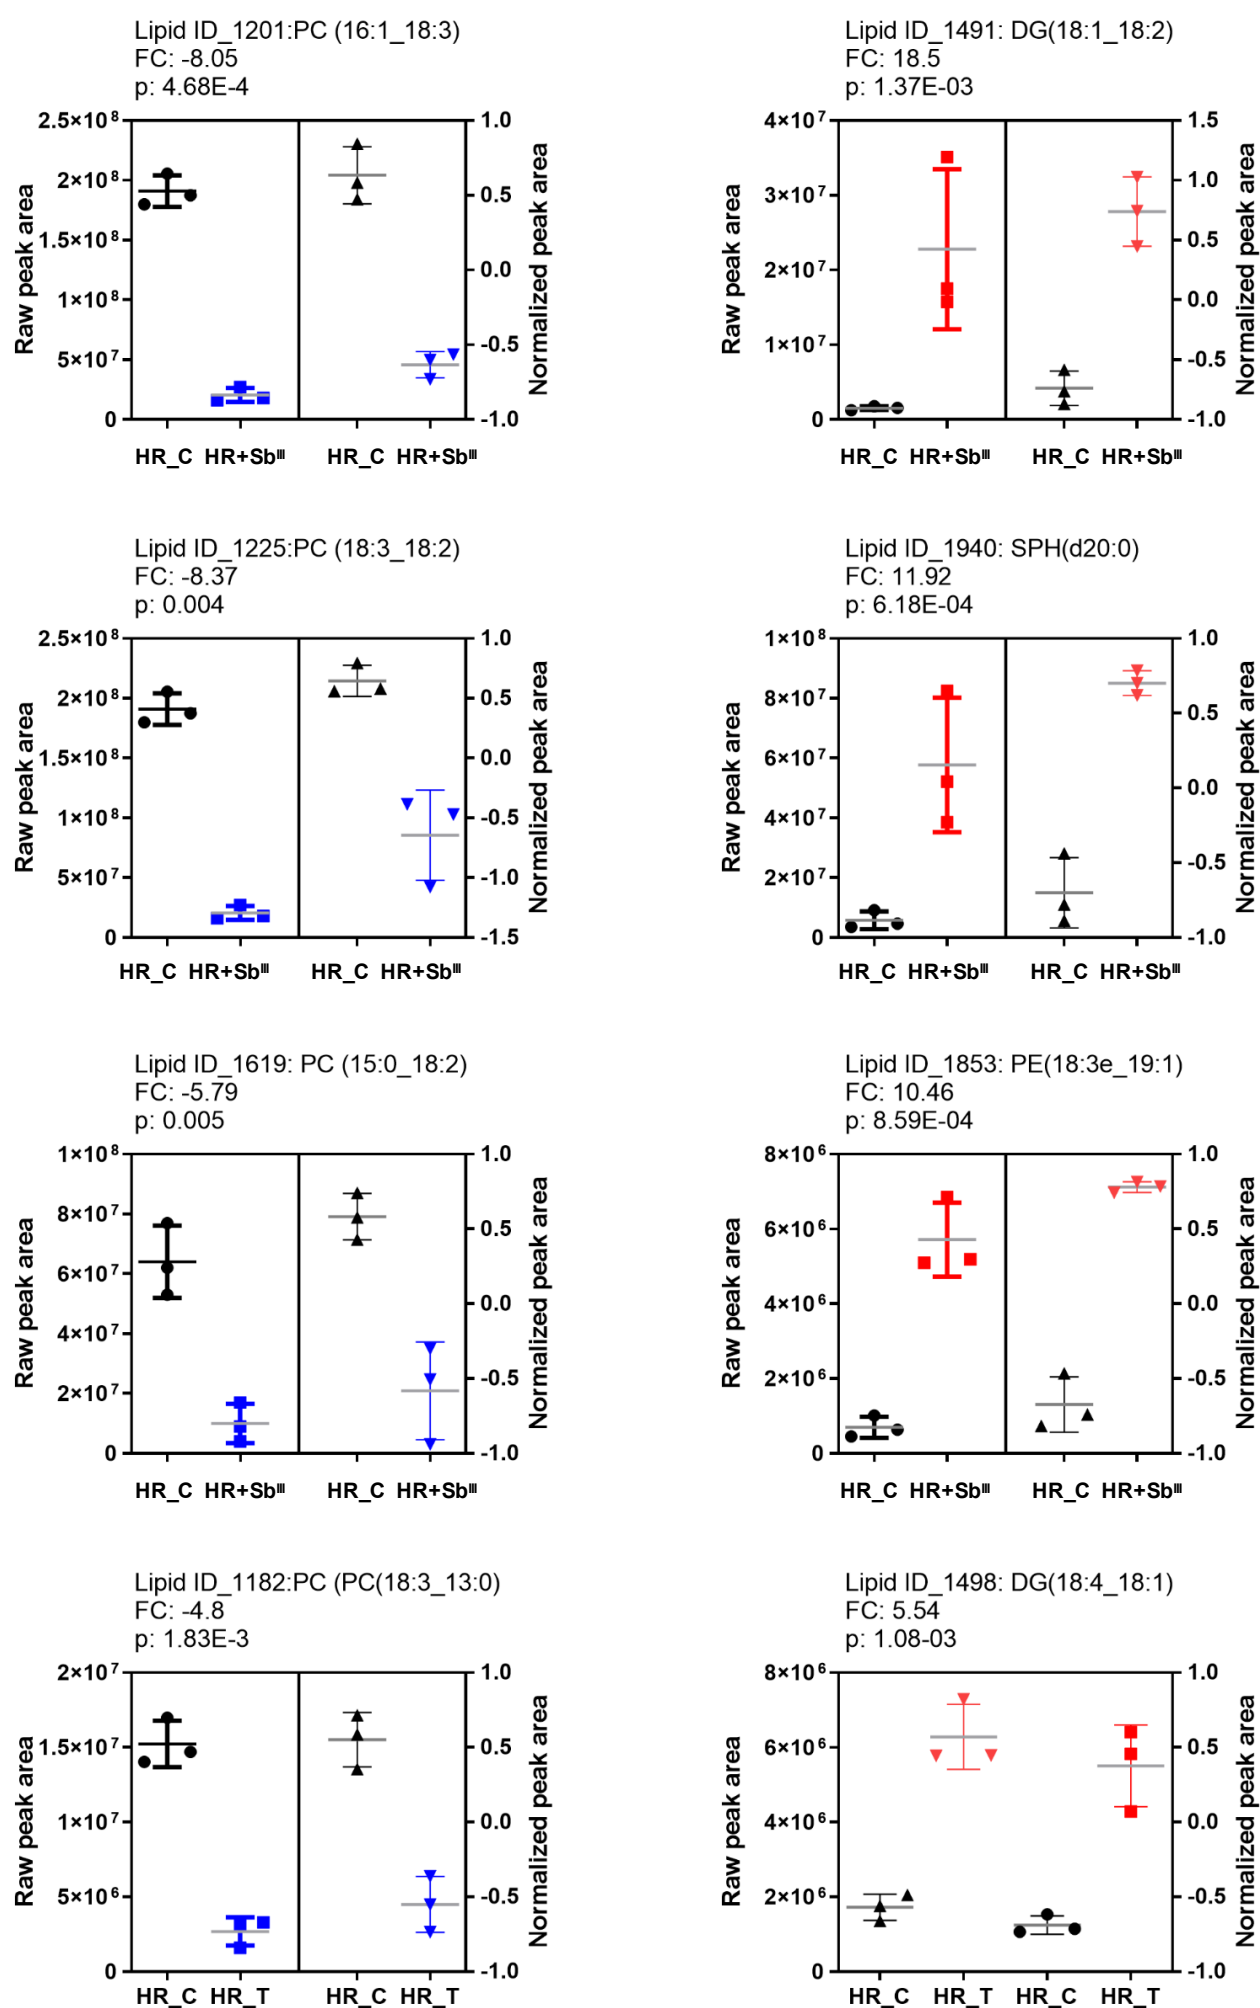

**Supplementary figure 2. Potential biomarkers detected after OPLS-DA associated with the antimony resistant phenotype under drug challenge.** The antimony resistant parasites growing under antimony challenge (HR+SbIII) were compared with the group of untreated parasites (HR\_C). The downregulated and up-regulated potential lipid biomarkers are highlighted in blue or red, respectively. Raw and normalized peak area intensity are plotted by lipid compound. The fold change (FC) and the raw p-value (p) are included per lipid.

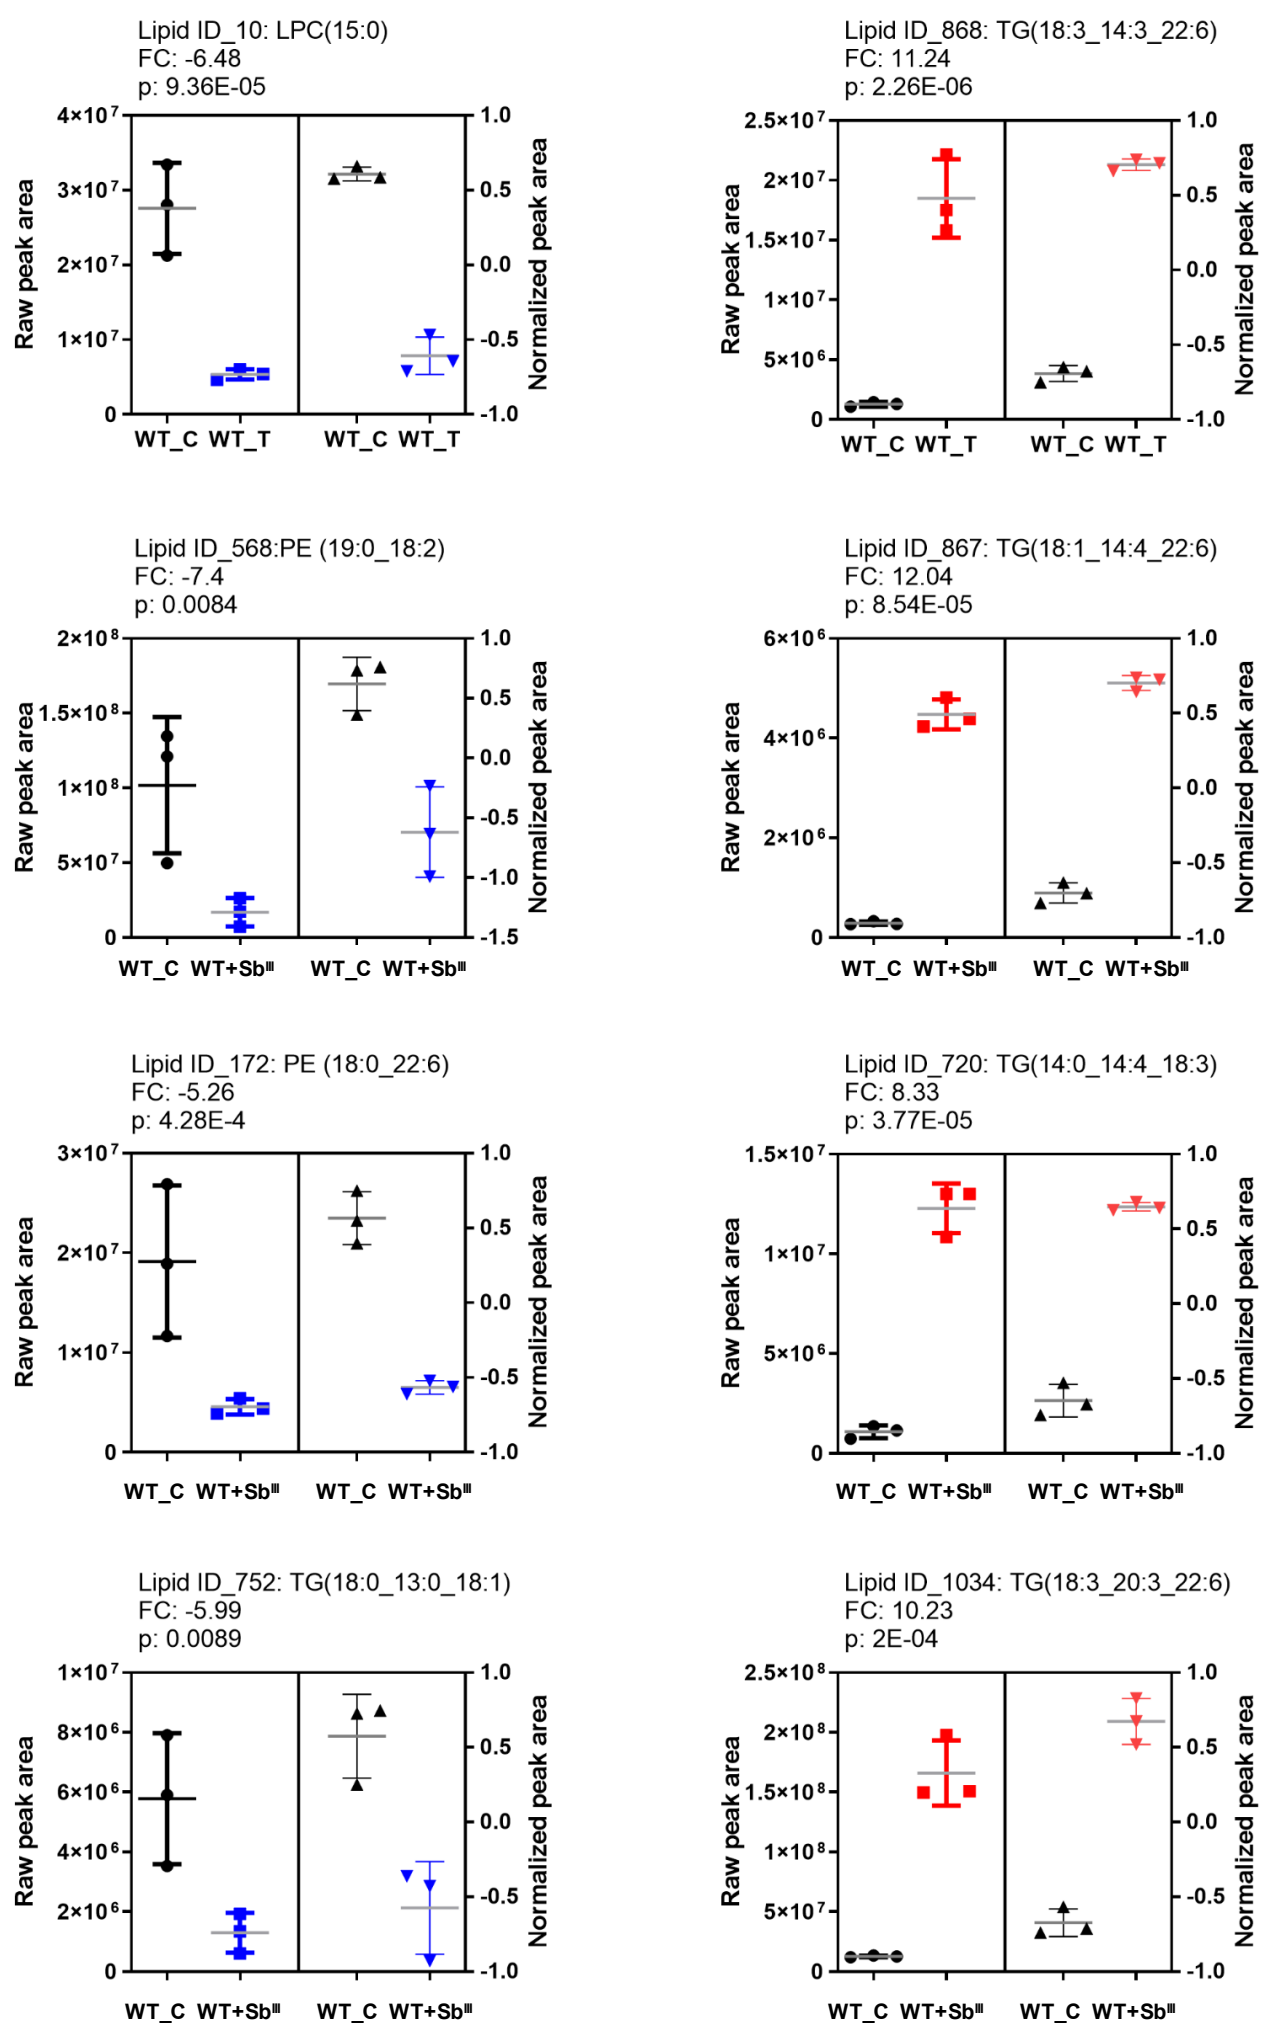

**Supplementary figure 3. Potential biomarkers detected after OPLS-DA associated with the sensitive phenotype under drug pressure.** The antimony sensitive parasites growing under antimony challenge (WT+SbIII) were compared with the group of untreated parasites (WT\_C). The downregulated and up-regulated potential lipid biomarkers are highlighted in blue or red, respectively. Raw and normalized peak area intensity are plotted by lipid compound. The fold change (FC) and the raw p-value (p) are included per lipid.
